# Supplementary material for: Social defeat: Vagal reduction and vulnerability to ventricular arrhythmias
Source: PubMed Central journal article supplement (PMC7739042; doi:10.1016/j.ynstr.2020.100245), 2020-08-03

# Supplemental Figure 1

A

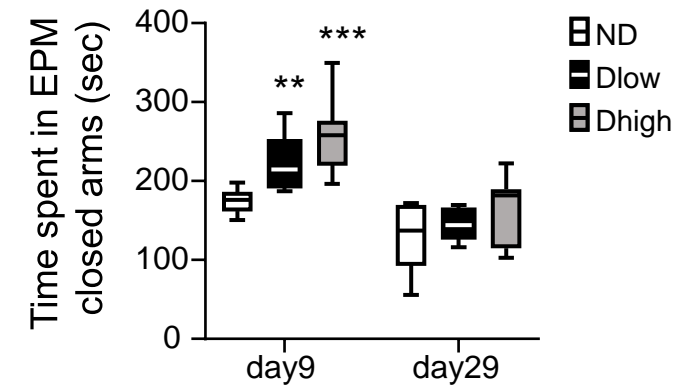

B

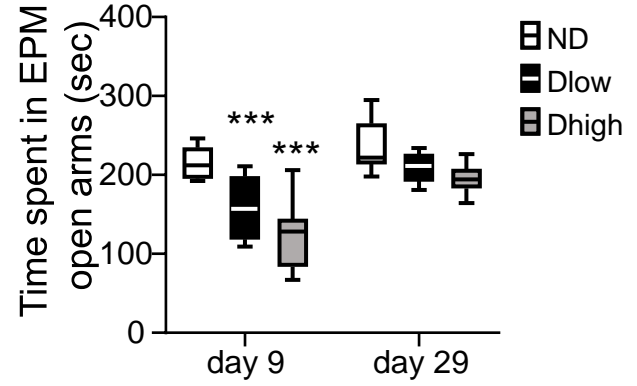

C

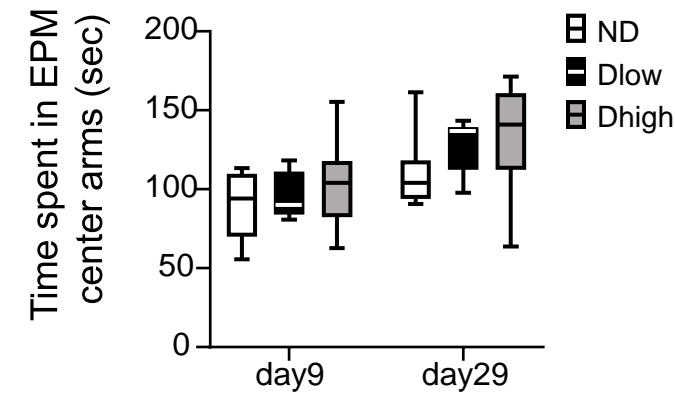

D

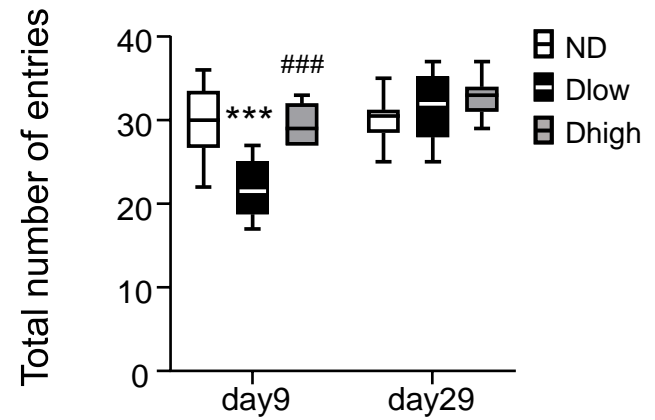

E

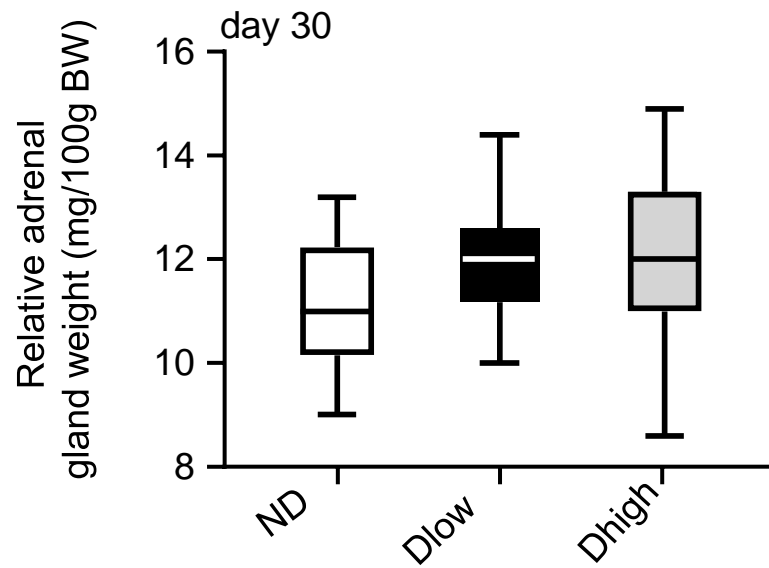

# Supplemental Fig 2

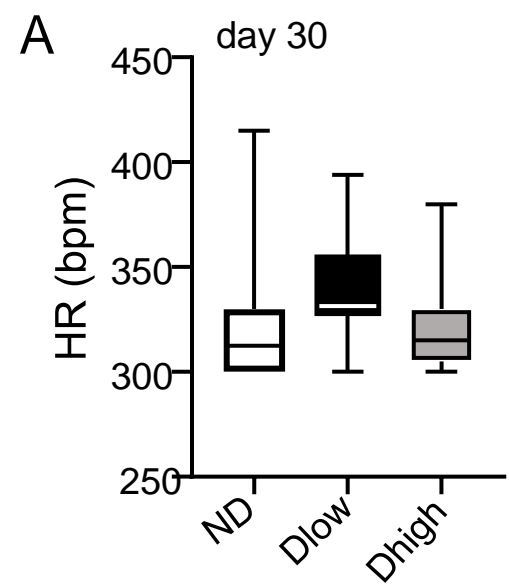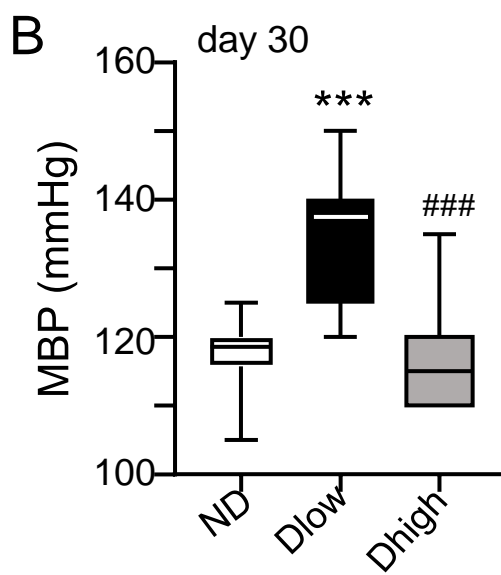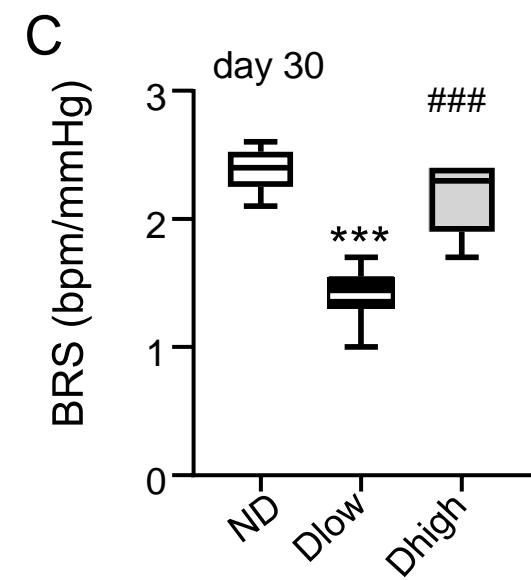

# Supplemental Fig 3

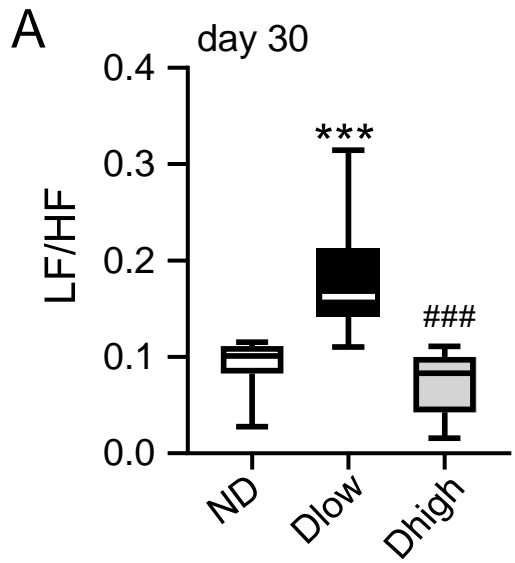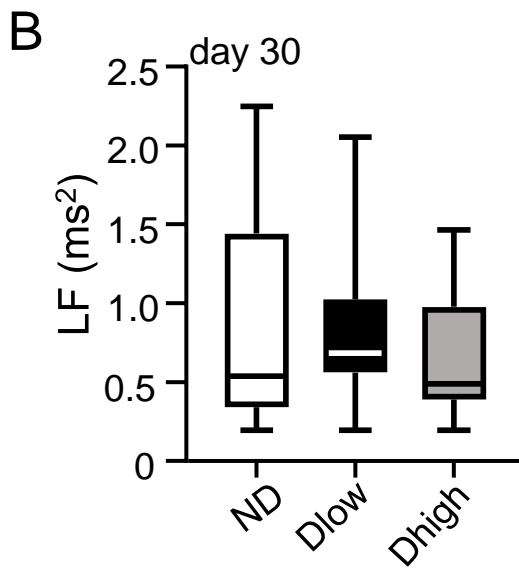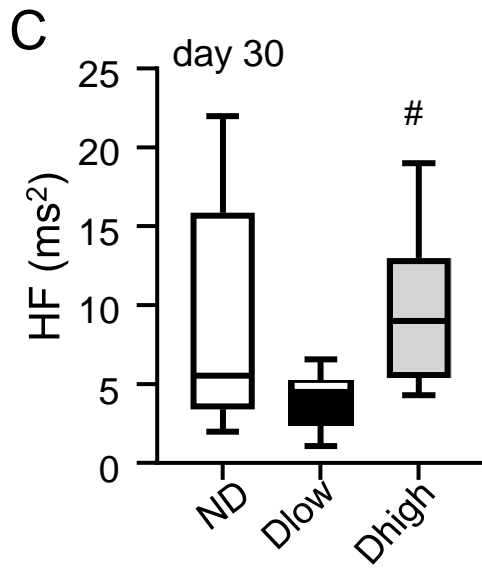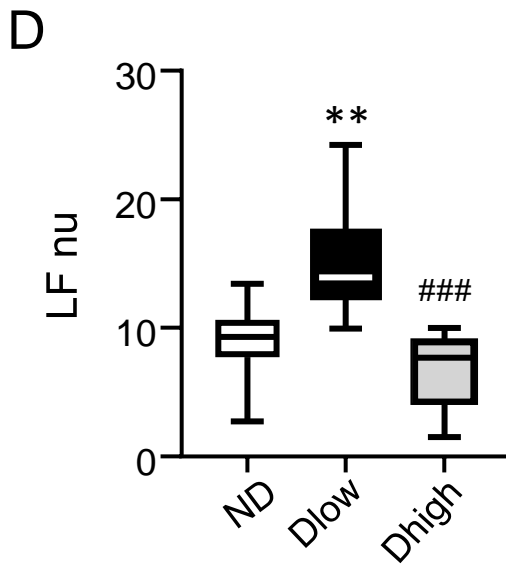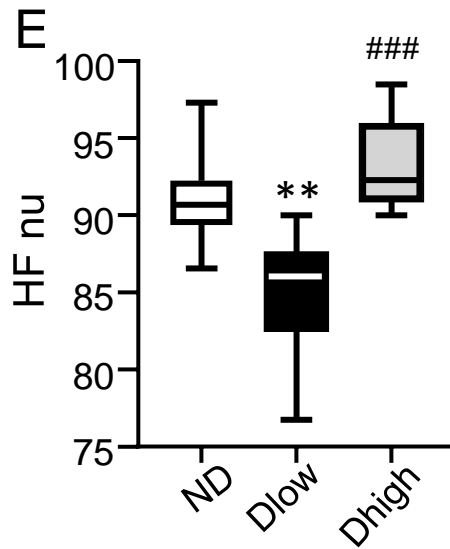

Supplement: mmc1.pdf [file mmc1.pdf]
